# Supplementary material for: Large-scale GWAS of food liking reveals genetic determinants and genetic correlations with distinct neurophysiological traits
Source: Springer Nature journal article supplement (doi:10.1038/s41467-022-30187-w), 2022-05-18
Supplement: 41467_2022_30187_MOESM1_ESM.pdf [file 41467_2022_30187_MOESM1_ESM.pdf]

1 **Supplementary Figures**

2

3 Fig. S1 Comparison of genetic and phenotypic correlation between the food  
4 liking traits. Panel A shows the correlation plot for all the pairwise  
5 correlation between the food traits used in the analysis. Two main groups  
6 of foods are visible and have been highlighted with the black boxes. Panel  
7 B Scatterplot of all pairwise genetic and phenotypic correlations. The red  
8 line represents the regression line. Although the genetic and phenotypic  
9 correlations resemble each other very closely ( $r > 0.9$ ) genetic correlations  
10 are  $\sim 2x$  as big reflecting the large amount of noise present in the  
11 questionnaire data.

12

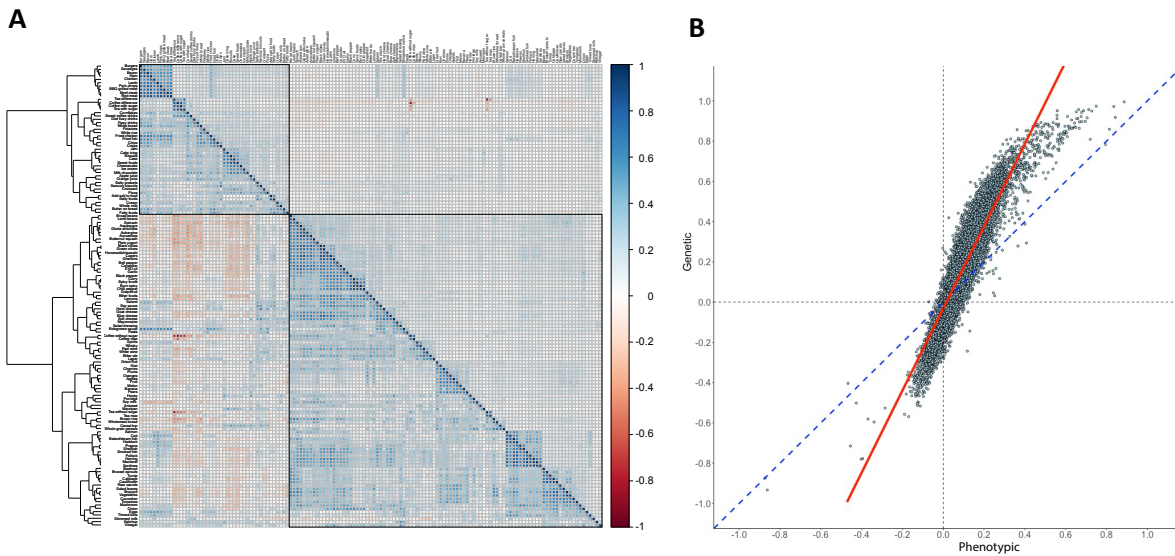

13

14

15

16

17

18

19

20

21

22

23



35 Fig S3. Effect of rs1229984 in *ADH1B* on food-liking traits. Forest plot of  
36 the effect of the C allele of rs1229984 on food liking. The point represents  
37 the point estimate while the bar represents the 95% CI. Only traits which  
38 colocalise and for which rs1229984 is the most likely causal SNP have  
39 been reported.

40

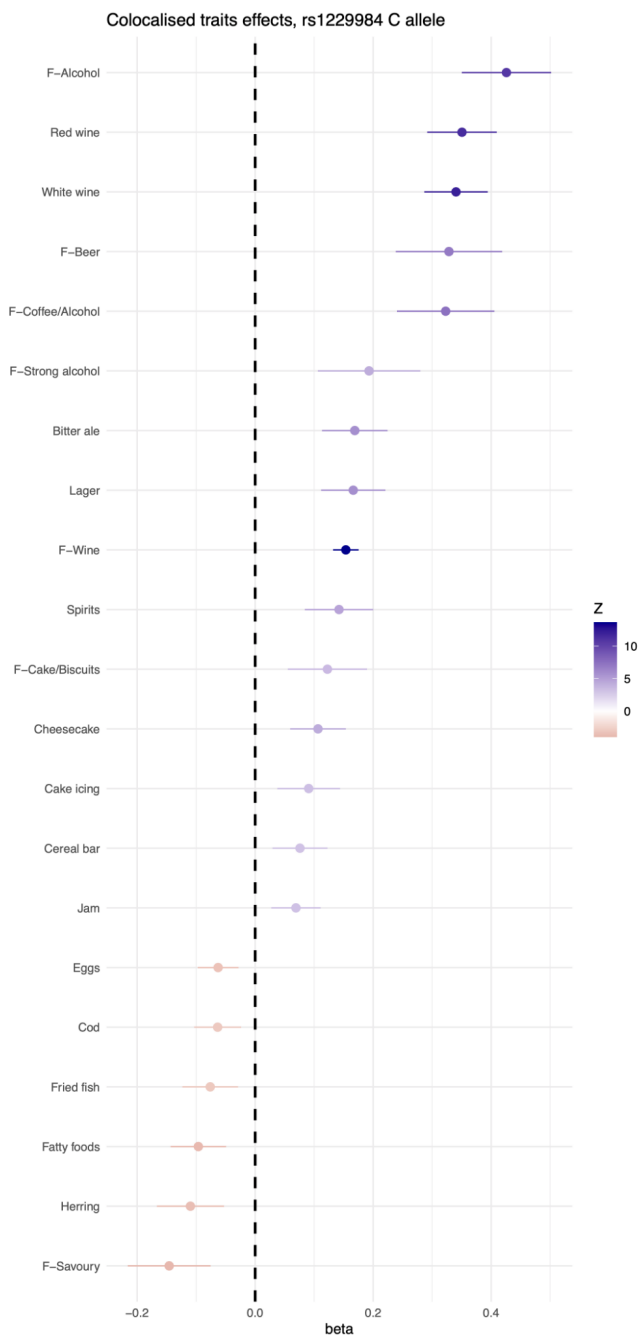

41

42

43 Fig S4. Effect of rs838133 in *FGF21* on food-liking traits. Forest plot of the  
 44 effect of the A allele of rs838133 on food liking. The point represents the  
 45 point estimate while the bar represents the 95% CI. Only traits which  
 46 colocalise and for which rs838133 is the most likely causal SNP have been  
 47 reported.

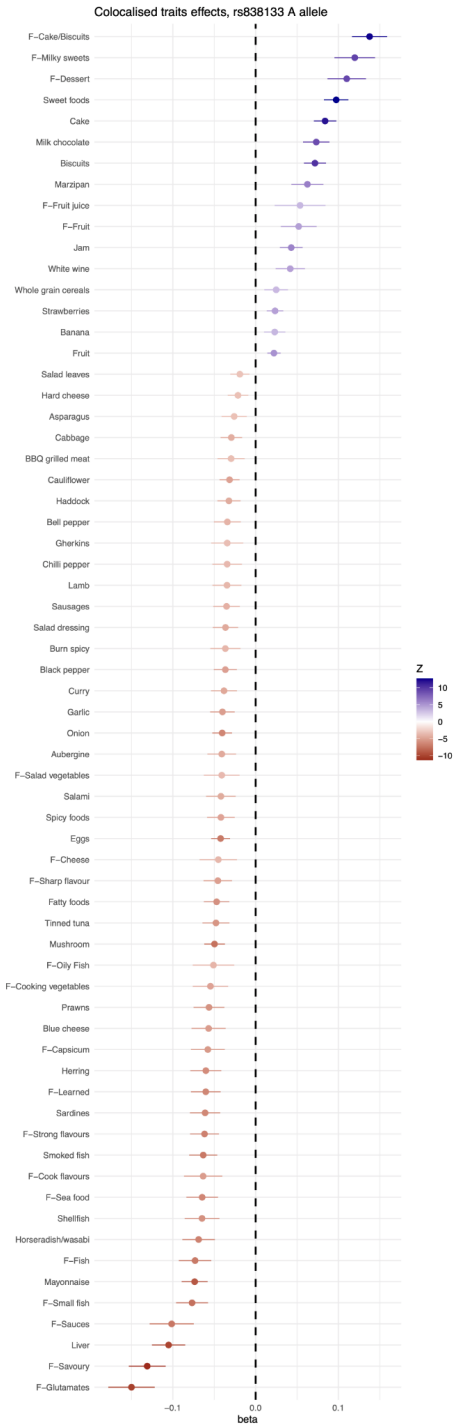

48

49

50 Fig S5. Effect of rs10423928 in *GIPR* on food-liking traits. Forest plot of the  
 51 effect of the A allele of rs10423928 on food liking. The point represents the  
 52 point estimate while the bar represents the 95% CI. Only traits which  
 53 colocalise and for which rs10423928 is the most likely causal SNP have  
 54 been reported.

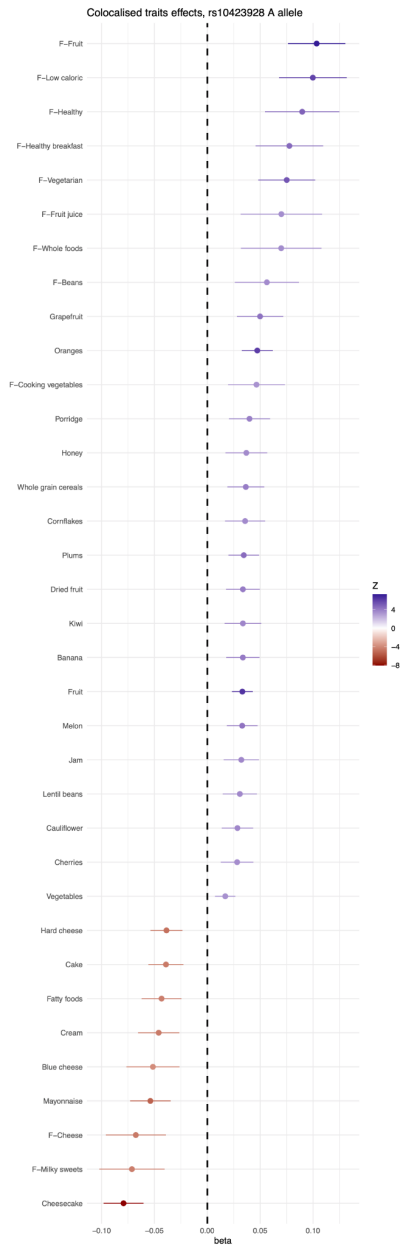

55  
 56  
 57  
 58  
 59
