# Supplementary material for: Large-scale GWAS of food liking reveals genetic determinants and genetic correlations with distinct neurophysiological traits
Source: Springer Nature journal article supplement (doi:10.1038/s41467-022-30187-w), 2022-05-18
Supplement: 41467_2022_30187_MOESM3_ESM.pdf [file 41467_2022_30187_MOESM3_ESM.pdf]

## **Description of Additional Supplementary Files**

File Name: Supplementary Data 1

Description: Summary statistics of the food liking traits.

File Name: Supplementary Data 2

Description: Cohort descriptors and information.

File Name: Supplementary Data 3

Description: List of loci used for the enrichment analysis.

File Name: Supplementary Data 4

Description: MRI genetic correlations.

File Name: Supplementary Data 5

Description: Food liking and consumption genetic correlation and heritability.

File Name: Supplementary Data 6

Description: Significant associations. The table reports the summary statistics of each significant association, only the top SNP per trait per locus is reported.

File Name: Supplementary Data 7

Description: Hypercoloc clustering.

File Name: Supplementary Data 8

Description: Number of hypercoloc clusters.

File Name: Supplementary Data 9

Description: Replication SNPs.

File Name: Supplementary Data 10

Description: Conditioned analysis results.

File Name: Supplementary Data 11

Description: FUMA tissue enrichment analysis.

File Name: Supplementary Data 12

Description: Go term Enrichment.

File Name: Supplementary Data 13

Description: Genetic correlations between the food-liking and brain MRI traits.

File Name: Supplementary Data 14

Description: Genetic correlation between liking and consumption of the same foods.
